# Supplementary material for: Bridging mesoscopic blend structure and property to macroscopic device performance via in situ optoelectronic characterization
Source: Royal Society of Chemistry journal article supplement (doi:10.1039/c2jm14896j), 2012-01-01
Supplement: c2jm14896j.pdf [file c2jm14896j.pdf]

## Supporting Information

# Bridging the Mesoscopic Blend Structure and Property to Macroscopic Device Performance by In-situ Optoelectronic Characterization

Han Yan,<sup>#a,b</sup> Denghua Li,<sup>#a,b</sup> Chao Li,<sup>a</sup> Kun Lu,<sup>a</sup> Yajie Zhang,<sup>a</sup> Zhixiang Wei,<sup>\*a</sup> Yanlian Yang,<sup>\*a</sup> and Chen Wang<sup>a</sup>

Phase images of blend films with different P3HT-PCBM ratios

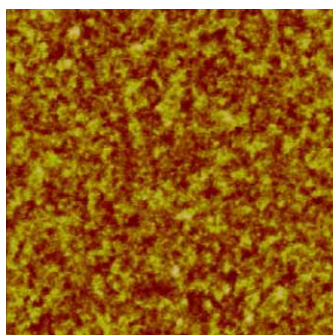

Fig S1. Tapping mode AFM ( $5\ \mu\text{m} \times 5\ \mu\text{m}$ ) tomography images for pure P3HT.

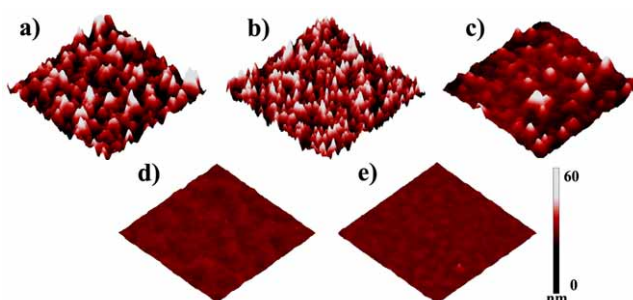

Fig S2. Tapping mode AFM ( $10\ \mu\text{m} \times 10\ \mu\text{m}$ ) tomography images corresponding to Fig. 2 with different P3HT:PCBM ratios a) 3:1, b) 2:1, c) 1:1, d) 1:2, e) 1:3.

Table S1. Morphology details of PSCs with various P3HT:PCBM ratios

| P3HT:PCBM  | Domain depth (nm) | Rms (nm)    | Domain shape (nm)   |
|------------|-------------------|-------------|---------------------|
| <b>3:1</b> | <b>83.5</b>       | <b>15.6</b> | <b>Strip</b>        |
| <b>2:1</b> | <b>69.4</b>       | <b>15.3</b> |                     |
| <b>1:1</b> | <b>57.8</b>       | <b>8.11</b> | <b>Strip+Sphere</b> |
| <b>1:2</b> | <b>23.1</b>       | <b>3.27</b> |                     |
| <b>1:3</b> | <b>14.6</b>       | <b>1.48</b> | <b>Sphere</b>       |

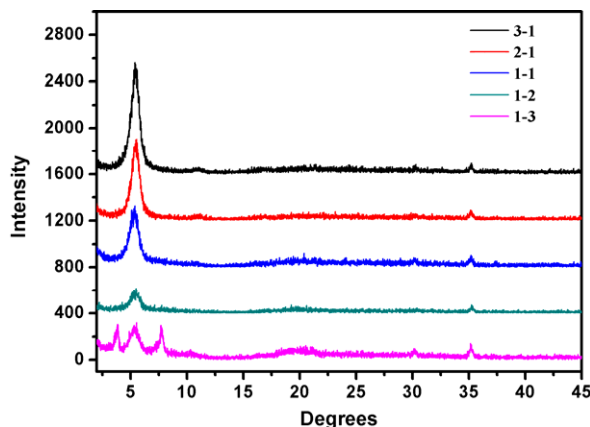

Fig 3. XRD images of P3HT:PCBM films fabricated by spin-coating and post processing.

### EFM phase image analysis of the blend films

The phase shift over the sample, due to tip-sample capacitive coupling is:

$$\phi = -\frac{Q}{2k} C'(h) (V_{ip} - V_0)^2$$

Where  $Q$  and  $k$  represent the quality factor and the elastic constant of the cantilever,  $h$  is the distance between the tip and the sample surface.  $C$  is the capacitance of the tip-sample system.  $V_{ip}$  is the voltage applied to the tip and  $V_s$  is the local electrostatic potential on the sample surface. EFM can map out the phase shift of the cantilever, a lag between the drive frequency and the cantilever oscillation. This equation allows us to understand the phase changes over the blend films. From the formula, we can deduce  $\Delta\phi$ :

$$\begin{aligned} \phi_{P3HT} - \phi_{PCBM} &= -\frac{Q}{2k} C'(h) [(V_{ip} - V_{P3HT})^2 - (V_{ip} - V_{PCBM})^2] \\ &= -\frac{Q}{2k} C'(h) (V_{P3HT} - V_{PCBM})(V_{P3HT} + V_{PCBM} - 2V_{ip}) \\ &= -\frac{Q}{2k} C'(h) (\phi_{P3HT} - \phi_{PCBM})(\phi_{P3HT} + \phi_{PCBM} - 2\phi_{ip}) \end{aligned}$$

According to the energy level tested previously, the work function of P3HT and PCBM in the blend system were 4.39 eV and 4.44 eV,<sup>1,2</sup> and the work function of Pt-Ir is about 5.7-6.1. Hence,  $V_{P3HT} - V_{PCBM} > 0$  and  $V_{P3HT} + V_{PCBM} - 2V_{ip} < 0$ . In EFM images, the brighter features indicate P3HT-rich regions, and the darker features represent PCBM-rich regions. Blend films containing different amounts of PCBM also prove this, increasing the content of PCBM results in the obvious increase of the darker spots.

### Surface potential characterization of the blend films with different P3HT-PCBM ratios

The topography, corresponding surface potential images in dark and under 532 nm illumination, and the statistic potential contrast distribution were concluded in this part.

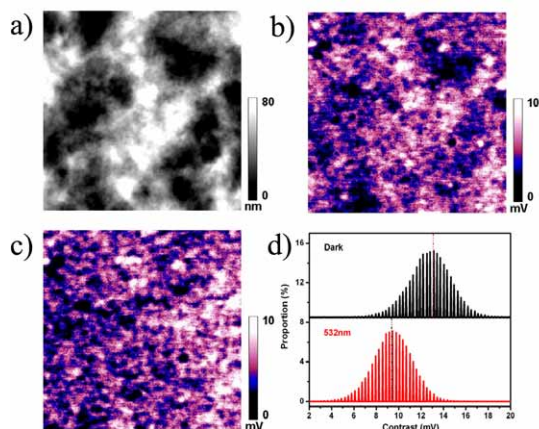

**Fig S4.** KPFM images ( $5\ \mu\text{m} \times 5\ \mu\text{m}$ ) of the P3HT:PCBM sample with 3:1. a) Topography, b) SP image in dark, c) SP image under illumination at 532 nm, d) Histogram distribution of the surface potential contrast in dark and under illumination at 532 nm.

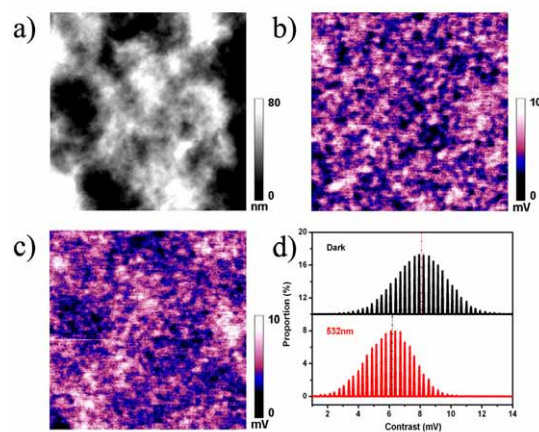

**Fig S5.** KPFM images ( $5\ \mu\text{m} \times 5\ \mu\text{m}$ ) of the P3HT:PCBM sample with 2:1. a) Topography, b) SP image in dark, c) SP image under illumination at 532 nm, d) Histogram distribution of the surface potential contrast in dark and under illumination at 532 nm.

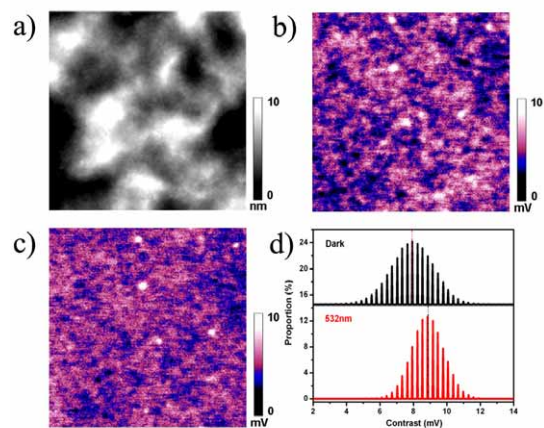

**Fig S6.** KPFM images ( $5\ \mu\text{m} \times 5\ \mu\text{m}$ ) of the P3HT:PCBM sample with 1:2. a) Topography, b) SP image in dark, c) SP image under illumination at 532 nm, d) Histogram distribution of the surface potential contrast in dark and under illumination at 532 nm.

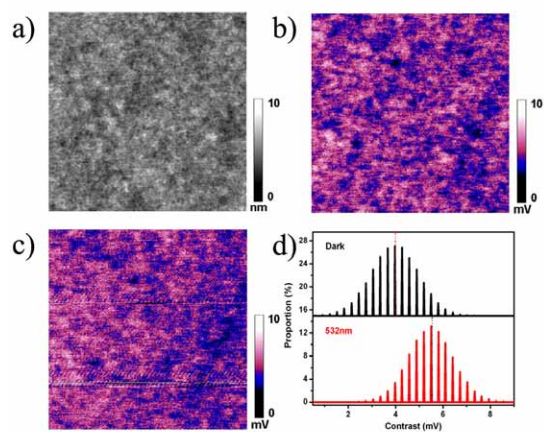

**Fig S7.** KPFM images ( $5\ \mu\text{m} \times 5\ \mu\text{m}$ ) of the P3HT:PCBM sample with 1:3. a) Topography, b) SP image in dark, c) SP image under illumination at 532 nm, d) Histogram distribution of the surface potential contrast in dark and under illumination at 532 nm.

## References

- 1 M. C. Wu, Y. Y. Lin, S. Chen, H. C. Liao, Y. J. Wu, C. W. Chen, Y.F. Chen and W. F. Su, *Chem. Phys. Lett.*, 2009, **468**, 64.
- 2 M. Lenes, F. B. Kooistra, J. C. Hummelen, I. Van Severen, L. Lutsen, D. Vanderzande, T. J. Cleij and P. W. M. Blom, *J. Appl. Phys.*, 2008, **104**, 114517.
